# Supplementary material for: A topographic lung cell atlas reveals regional variation in cell-type specific gene programs and identifies healthy and diseased cellular neighborhoods
Source: Research Square preprint supplement (doi:10.21203/rs.3.rs-5046381/v1), 2024-10-07
Supplement: Supplementary file 1 [file Supplementary_Table_1_Donor_details.xlsx]

## Sheet: Sheet1
Health status	Biopsy reason	Atlas donor number	COPD sample ID	Donor ID	Gender	Age	Smoking status	Cite of biopsy code	Cite of biopsy
Healthy	donor	1		640	Female	74	ex-smoker	1, 2, 3b	trachea, proximal lung, distal lung left upper lobe (top)
Healthy	donor	2	Healthy 2	588	Male	61	non-smoker	1, 2, 3a, 3c	trachea, proximal lung, distal lung left lower lobe, distal lung left upper lobe (bottom)
Healthy	donor	3		689	Male	41	smoker	1, 2, 3a	trachea, proximal lung, distal lung left lower lobe
Healthy	donor	4	Healthy 1	583	Male	28	smoker	1, 2, 3b, 3c	trachea, proximal lung, distal lung left upper lobe (top), distal lung left lower lobe
No COPD, cancer	patient		Healthy PT3	598	Male	72	non-smoker	3d	distal lung right lower lobe
COPD, cancer	patient		COPD 1	599	Female	75	unknown	3d	distal lung right lower lobe
COPD, cancer	patient		COPD 2	611	Female	68	smoker	3d	distal lung right lower lobe
COPD, cancer	patient		COPD 3	631	Male	74	ex-smoker	3c	distal lung left lower lobe
Region code:
1	LNG2	Trachea
2	LNG3	Proximal lung
3a	LNG1	Distal lung, left upper lobe (bottom)
3b	LNG5	Distal lung, left upper lobe (top)
3c	LNG6	Distal lung, left lower lobe
3d	LNG7	Distal lung, right lower lobe
