# Supplementary material for: A topographic lung cell atlas reveals regional variation in cell-type specific gene programs and identifies healthy and diseased cellular neighborhoods
Source: Research Square preprint supplement (doi:10.21203/rs.3.rs-5046381/v1), 2024-10-07
Supplement: Supplementary file 2 [file Supplementary_Table_2_SRT_methods_used_by_sample.xlsx]

## Sheet: Sheet1
Region	Donor 1 (640C)	Donor 2 (588B)	Donor 3 (689C)	Donor 4 (583B)
Trachea (1)	SCRINSHOT (Cell Type, Rare), HybISS	SCRINSHOT (Cell Type, Rare-quantified), HybISS	HybISS	SCRINSHOT (Cell Type, Rare-quantified), HybISS
Proximal lung (2)	SCRINSHOT (Cell Type, Rare), HybISS	SCRINSHOT (Cell Type), HybISS	SCRINSHOT (Cell Type, Rare-quantified), HybISS	SCRINSHOT (Cell Type, Rare-quantified), HybISS, VISIUM 3D, RRST
Distal lung (3a)		HybISS	HybISS
Distal lung (3b)	SCRINSHOT (Cell Type, Rare), HybISS, VISIUM, RRST		HybISS, SCRINSHOT (Cell Type, Rare)	SCRINSHOT (Cell Type, Rare-quantified), HybISS
Distal lung (3c)		SCRINSHOT (Cell Type, Rare-quantified), HybISS		RRST, SCRINSHOT (COPD)
		SCRINSHOT (Rare, COPD)
