# Supplementary material for: A topographic lung cell atlas reveals regional variation in cell-type specific gene programs and identifies healthy and diseased cellular neighborhoods
Source: Research Square preprint supplement (doi:10.21203/rs.3.rs-5046381/v1), 2024-10-07
Supplement: Supplementary file 3 [file Supplementary_Table_3_HybISS_cell_type_markers_and_probe_list.xlsx]

## Sheet: Sheet1
gene	Spapros_selection	celltypes_marker	Probe_name	LbarID	barcode sequence	number PLP	Provider	Project
A2M	TRUE	Alveolar Fibroblasts	A2M	LbarID_0087	CCTCCTAGACACGAGTATGA	5	CARTANA	DiscovAIR
ACAN	TRUE	chrondrocytes	ACAN	LbarID_0009	CGGTACGGAAGTGTATATCA	5	CARTANA	DiscovAIR
ACKR1	TRUE	Venous endothelial cell	ACKR1	LbarID_0029	GTCTGCATAGAGAACAACGT	5	CARTANA	DiscovAIR
ACTA2	TRUE	Venous smooth muscle,Pericytes airway	ACTA2	LbarID_0039	ATAGAGTCAACGAGCGTACC	5	CARTANA	DiscovAIR
ADIRF	TRUE	Peri-arterial airway smooth muscle	ADIRF	LbarID_0090	CTGATAGGAAGTGTCGCTAA	5	CARTANA	DiscovAIR
AGER	TRUE	AT1	AGER	LbarID_0026	GGTATAGTACATTCCCGCAC	5	CARTANA	DiscovAIR
AGR2	TRUE	Mucous SMG	AGR2	LbarID_0070	GCCTTACTACCTACGGGTTA	5	CARTANA	DiscovAIR
ALDH1A3	FALSE	Duct SMG (PMID: 36543915)	ALDH1A3	LbarID_0159	AACCAAGTAAACTCTCGTCG	5	CARTANA	DiscovAIR
ANXA2	TRUE	Erythrocyte,ILC,Mast_cell,Secreting_Goblet	ANXA2	LbarID_0117	GGTGTTATACGTGCATAGCC	5	CARTANA	DiscovAIR
APOC1	TRUE	Alv Macrophage	APOC1	LbarID_0010	GACAGTTTACACTATTCGCG	5	CARTANA	DiscovAIR
APOD	TRUE	Peribronchial fibroblasts,Nerve-fibro-1	APOD	LbarID_0021	CTCTGCGAAGGTAGTGTAAT	5	CARTANA	DiscovAIR
APOE	TRUE	Lipofibroblast	APOE	LbarID_0038	ATAGAGCGAACGATAGTTGC	5	CARTANA	DiscovAIR
AREG	TRUE	plasmacytoid DC	AREG	LbarID_0100	ACGACACTAAATATGGTCCC	5	CARTANA	DiscovAIR
ASCL3	TRUE	Ionocyte	ASCL3	LbarID_0142	CGGGATAGAATCGACTAGAC	5	CARTANA	DiscovAIR
ATP6V0B	TRUE	Ionocyte	ATP6V0B	LbarID_0003	CCTCGCACAAGTCTGATAGA	5	CARTANA	DiscovAIR
BIK	TRUE	Brush/Tuft cells	BIK	LbarID_0004	CTCTGTCGAGAAGGCTTGTA	5	CARTANA	DiscovAIR
BMX	TRUE	Brush/Tuft cells	BMX	LbarID_0143	CTATCAGGAAGTCGCGGTAA	5	CARTANA	DiscovAIR
BPIFB1	TRUE	Secretory	BPIFB1	LbarID_0086	CACGTACTAAGACCACTAGG	5	CARTANA	DiscovAIR
BTG1	TRUE	CD4 T cells	BTG1	LbarID_0103	ATATAACGATACCACCCGTG	5	CARTANA	DiscovAIR
C1QA	TRUE	Alv Macrophage	C1QA	LbarID_0108	CGGGACGTAAGTGTACTCAA	5	CARTANA	DiscovAIR
C1QC	TRUE	Interstitial macrophages	C1QC	LbarID_0052	TCGCGTTCACCGTAATCTTA	5	CARTANA	DiscovAIR
C3	TRUE	Mesothelial cell	C3	LbarID_0067	CGGTCAACTCTACCTAAGGA	5	CARTANA	DiscovAIR
CAPS	TRUE	Multiciliated	CAPS	LbarID_0015	TAGACGTAGTGAGCATGACT	5	CARTANA	DiscovAIR
CAV1	TRUE	AT1	CAV1	LbarID_0095	TACTTATGATGACTGCGGAC	5	CARTANA	DiscovAIR
CCL21	TRUE	Lymphatic EC	CCL21	LbarID_0012	GCCTAGATACCGTAGATGAC	5	CARTANA	DiscovAIR
CCL5	TRUE	CD8 T cells	CCL5	LbarID_0011	GACATAGACCATACCACGTT	5	CARTANA	DiscovAIR
CD24	TRUE	Neutrophilic Gr	CD24	LbarID_0125	TTCGGTCGATCTGAGGTAAC	5	CARTANA	DiscovAIR
CD3D	TRUE	CD8 T cells,CD4 T cells	CD3D	LbarID_0037	ATAGACTTAACGCACGATCC	5	CARTANA	DiscovAIR
CD3E	TRUE	CD8 T cells	CD3E	LbarID_0050	TACTATGCCTACCTGTCGAT	5	CARTANA	DiscovAIR
CD52	TRUE	CD4 T cells	CD52	LbarID_0062	CACGGCATACACAATTACGT	5	CARTANA	DiscovAIR
CD74	TRUE	cDC2,cDC1	CD74	LbarID_0051	TCGCGTCTACCTGACTTTAG	5	CARTANA	DiscovAIR
CD79A	TRUE	plasma cells,B cells	CD79A	LbarID_0048	GGTCAGAGACGTAGCATCAA	5	CARTANA	DiscovAIR
CD8A	TRUE	CD8 T cells	CD8A	LbarID_0150	TACTTTCTACGCCGCGATAG	5	CARTANA	DiscovAIR
CD9	TRUE	Schwann cells	CD9	LbarID_0094	TACTGTGTACGTTCAGCGAG	5	CARTANA	DiscovAIR
CDC20B	TRUE	Deuterosomal	CDC20B	LbarID_0033	ACCTAATAACACTCACGGGT	5	CARTANA	DiscovAIR
CDH2	TRUE	Basaloid alveolar progenitors	CDH2	LbarID_0005	ATATCTGAACCGACTATCCG	5	CARTANA	DiscovAIR
CFD	TRUE	Fibroblasts	CFD	LbarID_0073	GTAAGCACCTGTCAGTACCA	5	CARTANA	DiscovAIR
CHI3L1	TRUE	Perichondrial fibroblasts	CHI3L1	LbarID_0127	TTCTACTACTTTCGGGACGC	5	CARTANA	DiscovAIR
CLC	TRUE	Eosinophilic Gr	CLC	LbarID_0131	ACGACAGGAAATAGTGTTCG	5	CARTANA	DiscovAIR
CLDN5	TRUE	Cappillary A endothelial cell,Cappilary (G) endothelial cell,Arterial Endothelial cell	CLDN5	LbarID_0025	GCACTATTACGCAGAGCATC	5	CARTANA	DiscovAIR
CLEC9A			CLEC9A	LbarID_0111	CTATATCCAAGTCTGCGACA	5	CARTANA	DiscovAIR
CLU	TRUE	chrondrocytes	CLU	LbarID_0081	ACGATACTAAATGATCCCGC	5	CARTANA	DiscovAIR
COL1A1	TRUE	Lipofibroblast	COL1A1	LbarID_0002	CGGGTAGCACAATTAGTACA	5	CARTANA	DiscovAIR
COX4I2	TRUE	Pericytes parench	COX4I2	LbarID_0020	CTAGACTAATGCAGAGAGCG	5	CARTANA	DiscovAIR
CPA	TRUE	Basophilic Gr	CPA	LbarID_0134	AGCCTGGAACAGCTATACAC	5	CARTANA	DiscovAIR
CPA3	FALSE	Mast cells (PMID: 36543915)	CPA3	LbarID_0157	TTCTATCTAGTGATCGCGCA	5	CARTANA	DiscovAIR
CST3	TRUE	chrondrocytes	CST3	LbarID_0046	CTCTGTGAATACCGAGTACA	5	CARTANA	DiscovAIR
CXCL3			CXCL3	LbarID_0144	CTATCCGAATATACGCACGA	5	CARTANA	DiscovAIR
CXCR2	TRUE	Neutrophilic Gr	CXCR2	LbarID_0135	AGCCTTATAGAACCAGCTAC	5	CARTANA	DiscovAIR
DCN	TRUE	Adventitial Fibroblast,Alveolar Fibroblasts,Peribronchial fibroblasts,Nerve-fibro-1	DCN	LbarID_0030	TACGTTTGACGAGGAGTACA	5	CARTANA	DiscovAIR
DDIT4	FALSE	Nerve-fibro-2 (PMID: 36543915)	DDIT4	LbarID_0156	TTCTAGTAGCGTGAAGATGC	5	CARTANA	DiscovAIR
DNAH12	TRUE	Multiciliated,Deuterosomal	DNAH12	LbarID_0041	CACACTGTAAGACGATAGCC	5	CARTANA	DiscovAIR
EDNRB	TRUE	Cappillary A endothelial cell	EDNRB	LbarID_0078	AACGATCTAAACCGTATCCG	5	CARTANA	DiscovAIR
EGR1	TRUE	Peri-arterial airway smooth muscle	EGR1	LbarID_0124	TTCGGTATAGTGGAGTCTCA	5	CARTANA	DiscovAIR
EPCAM	TRUE	Baseloid alveolar progenitors	EPCAM	LbarID_0126	TTCGTCGGATCGAGGTTATC	5	CARTANA	DiscovAIR
FABP5	TRUE	none	FABP5	LbarID_0098	AACACGTTAAACCCGATCTG	5	CARTANA	DiscovAIR
FBLN1	TRUE	Adventitial Fibroblast	FBLN1	LbarID_0019	CTAGACATATCTCACAGCGA	5	CARTANA	DiscovAIR
FCGR3B	TRUE	Neutrophilic Gr	FCGR2B	LbarID_0044	CGGACTAAGGGCGACTAATA	5	CARTANA	DiscovAIR
FCN1	TRUE	Monocytes	FCN1	LbarID_0034	ACCTACCTAAAGTGACATCG	5	CARTANA	DiscovAIR
FCN3	TRUE	Cappilary (G) endothelial cell	FCN3	LbarID_0053	ACCTACGAACACTAAGTCGG	5	CARTANA	DiscovAIR
FHOD3	TRUE	Myoepithelial cell	FHOD3	LbarID_0132	ACGACCCTAAAGTCTAATCG	5	CARTANA	DiscovAIR
FKBP11	FALSE	plasma cells (PMID: 36543915)	FKBP11	LbarID_0158	AACATGGTAAACGACTCTCC	5	CARTANA	DiscovAIR
FN1	TRUE	Fibroblast_alveolar	FN1	LbarID_0107	CGGCTTCGAGAATGAGATAC	5	CARTANA	DiscovAIR
FXYD1	TRUE	Schwann cells	FXYD1	LbarID_0074	GTAAGCGGCTAGACGTACTA	5	CARTANA	DiscovAIR
GADD45B	TRUE	Peri-arterial airway smooth muscle	GADD45B	LbarID_0116	GCCGAGTTACCGATATTGAC	5	CARTANA	DiscovAIR
GAPT	TRUE	Eosinophilic Gr	GAPT	LbarID_0136	ATATAGAGAAGAGGCTCGCC	5	CARTANA	DiscovAIR
GNLY	TRUE	NK cells	GNLY	LbarID_0054	TAGACTCTCGATCAGCCGTA	5	CARTANA	DiscovAIR
GPM6B	TRUE	Schwann cells	GPM6B	LbarID_0049	GTCTGGAGAGATCAGTATCC	5	CARTANA	DiscovAIR
GPR183	TRUE	plasmacytoid DC	GPR183	LbarID_0112	CTGATGCTACACTAGGCACA	5	CARTANA	DiscovAIR
GPX3	TRUE	Endothelia_vascular_Cap_a,Fibroblast_alveolar	GPX3	LbarID_0082	AGCGGGTGAAATGACTATAC	5	CARTANA	DiscovAIR
GRID2	TRUE	Perichondrial fibroblasts	GRID2	LbarID_0137	ATATAGTCAACGATGGGACC	5	CARTANA	DiscovAIR
GRP	FALSE	Neuroendocrine (PMID: 36543915)	GRP	LbarID_0387	CGAGTGTCACATACCACATA	5	CARTANA	DiscovAir
GZMB	TRUE	plasmacytoid DC	GZMB	LbarID_0045	CTAGACTGAATCATCACCGA	5	CARTANA	DiscovAIR
HDC	TRUE	Basophilic Gr	HDC	LbarID_0129	AACAGTTAAGAACCTCTCGC	5	CARTANA	DiscovAIR
HES6	FALSE	Deuterosomal (PMID: 36543915)	HES6	LbarID_0388	CGAGTTACAGAGAGTACACG	5	CARTANA	DiscovAir
HLA-DPA1	TRUE	cDC2,cDC1	HLA-DPA1	LbarID_0093	GGTGCTCTACGAGTCTGATA	5	CARTANA	DiscovAIR
HLA-DPB1	TRUE	cDC2,cDC1	HLA-DPB1	LbarID_0016	CGGACATTACCACCTAGAGT	5	CARTANA	DiscovAIR
HLA-DQA1	TRUE	cDC2,cDC1	HLA-DQA1	LbarID_0123	TCGTATAGCTGTATCGACGG	5	CARTANA	DiscovAIR
HLA-DRA	TRUE	Interstitial macrophages	HLA-DRA	LbarID_0024	CTTTGTGAATAGTCTAGCGC	5	CARTANA	DiscovAIR
HLA-DRB1	TRUE	B cells,Alv Macrophage	HLA-DRB1	LbarID_0063	CACGGTATAGACACCACGTA	5	CARTANA	DiscovAIR
HLA-DRB5	TRUE	B cells	HLA-DRB5	not available
HPGD	TRUE	Cappillary A endothelial cell	HPGD	not available
HSPB1	TRUE	Endothelia_vascular_Cap_a	HSPB1	LbarID_0105	ATATACACAAGGACCTCGCG	5	CARTANA	DiscovAIR
IER2	TRUE	Erythrocyte	IER2	LbarID_0109	CGGGACTAAGGTACGTTACA	5	CARTANA	DiscovAIR
IFI27	TRUE	Cappillary A endothelial cell,Cappilary (G) endothelial cell,Arterial Endothelial cell	IFI27	LbarID_0101	AGCCGTATAAATCACAGTCC	5	CARTANA	DiscovAIR
IFITM1	TRUE	Pericytes airway	IFITM1	LbarID_0085	ATATTCGCAACCTACGTCGA	5	CARTANA	DiscovAIR
IFITM2	TRUE	Monocyte_CD16	IFITM2/IFITM3	LbarID_0110	CTATACGCAATGCACTCAGA	5	CARTANA	DiscovAIR
IFITM3	TRUE	Basal	IFITM3	LbarID_0068	GACATCAGAGTACCAGCTCA	5	CARTANA	DiscovAIR
IGFBP7	TRUE	Lymphatic EC	IGFBP7	LbarID_0088	CCTCGATCACCAGAGTTAGA	5	CARTANA	DiscovAIR
IL1RL1	TRUE	Cappillary A endothelial cell	IL1RL1	LbarID_0089	CTGAGTAAGTCTTCCACACG	5	CARTANA	DiscovAIR
IL32	TRUE	CD8 T cells	IL32	LbarID_0091	CTGATCCACGTACAGAGTGA	5	CARTANA	DiscovAIR
JCHAIN	TRUE	plasma cells,plasmacytoid DC	JCHAIN	LbarID_0032	ACCTAAGTAAACGGCGTACC	5	CARTANA	DiscovAIR
JUN	TRUE	none	JUN	LbarID_0121	TACTTGTAGATAGCGAGCGA	5	CARTANA	DiscovAIR
KDR	TRUE	Perichondrial fibroblasts	KDR	LbarID_0145	CTGCGACGAAGTTAGTCTAC	5	CARTANA	DiscovAIR
KLF6	TRUE	none	KLF6	LbarID_0104	ATATAATTCACGACACCGCG	5	CARTANA	DiscovAIR
KLRD1	TRUE	NK cells	KLRD1	LbarID_0118	GGTTACGTCCACTCACTTTA	5	CARTANA	DiscovAIR
KRT15	TRUE	Basal	KRT15	LbarID_0151	TAGAAGTAGTGGACTGCTCC	5	CARTANA	DiscovAIR
KRT17	TRUE	Basal	KRT17	not available
KRT5	TRUE	Basal,Suprabasal	KRT5	LbarID_0059	ACGAGTAGAAATGACGCTCC	5	CARTANA	DiscovAIR
LAMC3	TRUE	Pericytes parench	LAMC3	LbarID_0055	TTGACATAGTGGTCGAGTTC	5	CARTANA	DiscovAIR
LTBP2	TRUE	Peribronchial fibroblasts	LTBP2	LbarID_0080	ACGATAATAACAGCTCCTCG	5	CARTANA	DiscovAIR
LYZ	TRUE	Serous SMG	LYZ	LbarID_0013	GGTTGCTACGATGACTCAGT	5	CARTANA	DiscovAIR
MCEMP1	TRUE	Alv Macrophage	MCEMP1	LbarID_0149	GGTTATCACTACTCAGCGGA	5	CARTANA	DiscovAIR
MGP	TRUE	Adventitial Fibroblast,Alveolar Fibroblasts	MGP	LbarID_0115	GCCGAGACAGTGGTATATCT	5	CARTANA	DiscovAIR
MKI67	TRUE	Cycling cells	MKI67	LbarID_0133	AGCCTCGTAAATCTCTCAGA	5	CARTANA	DiscovAIR
MS4A1	TRUE	B cells	MS4A1	LbarID_0028	GTCTGAGAATGTGTTAGCAC	5	CARTANA	DiscovAIR
MSLN	FALSE	Mesothelial cell (PMID: 36543915)	MSLN	LbarID_0153	TAGACATCCTATCCAGCGTA	5	CARTANA	DiscovAIR
MT1A	TRUE	Pericytes airway	MT1A	LbarID_0065	CCTTATCGAAGTAGACGACA	5	CARTANA	DiscovAIR
MT2A	TRUE	none	MT2A	LbarID_0083	ATATGGACAACCCTCTACAG	5	CARTANA	DiscovAIR
MUC5AC	FALSE	Goblet (PMID: 36543915)	MUC5AC	LbarID_0154	TCGTATCGAGATTAGCGAGT	5	CARTANA	DiscovAIR
MUC5B	TRUE	Mucous SMG	MUC5B	LbarID_0007	CCTTAACTCGCGTTCAAGTA	5	CARTANA	DiscovAIR
MYH11	TRUE	Venous smooth muscle,Peribronchial smooth muscle	MYH11	LbarID_0069	GACATCGCAGCAGATAGATC	5	CARTANA	DiscovAIR
MYL9	TRUE	Venous smooth muscle,Peri-arterial airway smooth muscle,Peribronchial smooth muscle	MYL9	LbarID_0084	ATATGTATAACGCCTACCCG	5	CARTANA	DiscovAIR
NKG7	TRUE	NK cells	NKG7	LbarID_0022	CTTTCCAATACGGTGTACGA	5	CARTANA	DiscovAIR
NREP	TRUE	Undefined rare cell	NREP	LbarID_0001	GCCTACTCACCTGTATGTAT	5	CARTANA	DiscovAIR
PBK	TRUE	Cycling cells	PBK	LbarID_0138	CACGACTAACTAGGGTACAC	5	CARTANA	DiscovAIR
PCSK1N	FALSE	Neuroendocrine (PMID: 36543915)	PCSK1N	LbarID_0155	TCGTATGTATATGAGCGGCA	5	CARTANA	DiscovAIR
PLA2G2A	TRUE	Mesothelial cell	PLA2G2A	LbarID_0043	CCGTCGATACAGACTCAGAT	5	CARTANA	DiscovAIR
PLAC9			PLAC9	LbarID_0097	TCGTACTGATTGACGGTGAT	5	CARTANA	DiscovAIR
PLD5	TRUE	Myoepithelial cell	PLD5	LbarID_0139	CACGAGATAAGACTCATCCG	5	CARTANA	DiscovAIR
PLIN2	TRUE	Lipofibroblast	PLIN2	LbarID_0141	CCTGCGCTACACAGTATTAG	5	CARTANA	DiscovAIR
PLVAP	TRUE	Venous endothelial cell	PLVAP	LbarID_0047	GAACTATGCTGACAGTACCG	5	CARTANA	DiscovAIR
PRR4	TRUE	Serous SMG	PRR4	not available
PRSS23	TRUE	Goblet	PRSS23	LbarID_0079	ACGAGTGTAAAGTAGACGCC	5	CARTANA	DiscovAIR
RAMP2	TRUE	Lymphatic EC	RAMP2	LbarID_0076	TTGATATAGCGTATTCGCGC	5	CARTANA	DiscovAIR
RGCC	TRUE	Cappilary (G) endothelial cell,Alveolar Fibroblasts	RGCC	LbarID_0077	TTGATCGTAGATTCGTGAGC	5	CARTANA	DiscovAIR
RGS13	TRUE	Brush/Tuft cells	RGS13	LbarID_0128	AACAGTAGAAACTCGTCCCG	5	CARTANA	DiscovAIR
RHOB	TRUE	none	RHOB	LbarID_0099	ACGAAGTAACACGTCCTACG	5	CARTANA	DiscovAIR
RNASE1	TRUE	Interstitial macrophages	RNASE1	LbarID_0119	GTGAGTCGAATTTGTGTACC	5	CARTANA	DiscovAIR
RPS29	TRUE	Club	RPS29	not available
S100A11	TRUE	none	S100A11	LbarID_0066	CGGTACTAAGGCTGACCTAA	5	CARTANA	DiscovAIR
S100A2	TRUE	Basal	S100A2	LbarID_0040	CACACTAACTCGAATGACGT	5	CARTANA	DiscovAIR
S100A4	TRUE	Cappillary A endothelial cell	S100A4	LbarID_0102	AGCCTAGCAAATGTAGTACC	5	CARTANA	DiscovAIR
S100A8	TRUE	Monocytes	S100A8	LbarID_0152	TAGACACTTGTACTTAGCCG	5	CARTANA	DiscovAIR
S100B	TRUE	Schwann cells	S100B	LbarID_0031	ACCGTTCCAAACTATAAGCG	5	CARTANA	DiscovAIR
S100P	TRUE	Goblet	S100P	LbarID_0064	CACGGTCAACTAGGTGAGAA	5	CARTANA	DiscovAIR
SAT1	TRUE	Monocytes	SAT1	LbarID_0096	TACTTCATATCAGTCGCACG	5	CARTANA	DiscovAIR
SCEL	TRUE	Squamous epithelial cells	SCEL	LbarID_0130	AACATAGCAAACTCTCTCGG	5	CARTANA	DiscovAIR
SCGB1A1	TRUE	Club	SCGB1A1	LbarID_0058	ACGAGGTTAAAGTCAAGTCC	5	CARTANA	DiscovAIR
SEC11C	TRUE	Neuroendocrine,Ionocyte	SEC11C	LbarID_0035	AGATACGGAAATGGACGTTC	5	CARTANA	DiscovAIR
SERPINA1	TRUE	Alv Macrophage	SERPINA1	LbarID_0114	GACACTGACTGACATCGAGA	5	CARTANA	DiscovAIR
SERPINB3	TRUE	Suprabasal	SERPINB3	LbarID_0017	CGGACCTCAAGTGAAGTACA	5	CARTANA	DiscovAIR
SFTPA1	TRUE	AT2	SFTPA1	LbarID_0036	AGATACTTAACCATAGCGCC	5	CARTANA	DiscovAIR
SFTPB	TRUE	AT2,Club	SFTPB	LbarID_0008	CCTTAGACACATCATACGGA	5	CARTANA	DiscovAIR
SLC2A1	TRUE	Nerve-fibro-2	SLC2A1	LbarID_0018	CTAGACAGACTGCGACATAC	5	CARTANA	DiscovAIR
SLPI	TRUE	none	SLPI	LbarID_0075	TAGAGCATCTGACGCTATGA	5	CARTANA	DiscovAIR
SPRR1A	TRUE	Baseloid alveolar progenitors	SPRR1A	LbarID_0146	GACAGGACGTACCACATCTT	5	CARTANA	DiscovAIR
SPRR1B	TRUE	Squamous epithelial cells	SPRR1B	LbarID_0140	CCTGACTAAGCTCGATAGAG	5	CARTANA	DiscovAIR
SPRR3	TRUE	Squamous epithelial cells	SPRR3	LbarID_0147	GGTTAGCACTAGATCGCACT	5	CARTANA	DiscovAIR
SRGN	TRUE	Arterial Endothelial cell	SRGN	LbarID_0061	ATATCTTTAACGTCGAGCGC	5	CARTANA	DiscovAIR
STEAP4	TRUE	Pericytes airway	STEAP4	LbarID_0071	GCGAATGTCGGAGACTACTT	5	CARTANA	DiscovAIR
TAGLN	TRUE	Venous smooth muscle,Peri-arterial airway smooth muscle,Pericytes airway,Peribronchial smooth muscle	TAGLN	LbarID_0014	GTAACCCGCTATCAGATCGA	5	CARTANA	DiscovAIR
TCF21	TRUE	Alveolar Fibroblasts	TCF21	LbarID_0056	AACCGTCTAAACCATACGTG	5	CARTANA	DiscovAIR
TFF3	TRUE	Lymphatic EC,Mucous SMG,Neuroendocrine	TFF3	LbarID_0042	CCGTCAGAAGCCATACTAGA	5	CARTANA	DiscovAIR
TIMP1	TRUE	Mesothelial cell	TIMP1	LbarID_0092	GCCGACCTACCGTATGATAT	5	CARTANA	DiscovAIR
TOP2A	TRUE	Cycling cells	TOP2A	LbarID_0148	GGTTATAGCTGAGCACTACA	5	CARTANA	DiscovAIR
TPM2	TRUE	Venous smooth muscle,Peri-arterial airway smooth muscle,Peribronchial smooth muscle	TPM2	not available
TPSAB1	TRUE	Mast cells	TPSAB1	LbarID_0006	CACGGATAACTACTAGACCG		CARTANA	DiscovAIR
TSC22D3	TRUE	none	TSC22D3	LbarID_0122	TACTTGTCACTCAGACCGTA	5	CARTANA	DiscovAIR
TYROBP	TRUE	plasmacytoid DC	TYROBP	LbarID_0027	GGTATGCGACCTACTCTTAC	5	CARTANA	DiscovAIR
VIM	TRUE	Schwann cells	VIM	LbarID_0106	CACGACAACTTAGTACAGCG	5	CARTANA	DiscovAIR
VSIG2	FALSE	Goblet (PMID: 36543915)	VSIG2	LbarID_0160	ACGACCTTAAATCAACTGCG	5	CARTANA	DiscovAIR
WFDC2	TRUE	Goblet,Duct SMG,Serous SMG	WFDC2	LbarID_0023	CTTTCGACGCTGACACTAAA	5	CARTANA	DiscovAIR
ZFP36	TRUE	none	ZFP36	LbarID_0113	GACACTCGACGCCATAGATA	5	CARTANA	DiscovAIR
