# Supplementary material for: A topographic lung cell atlas reveals regional variation in cell-type specific gene programs and identifies healthy and diseased cellular neighborhoods
Source: Research Square preprint supplement (doi:10.21203/rs.3.rs-5046381/v1), 2024-10-07
Supplement: Supplementary file 4 [file Supplementary_Table_4_HybISS_cell_type_annotation.xlsx]

## Sheet: Sheet1
Cell class (level 1)	Positive markers	Cell type (level 2)	Subtypes (level 3)	Positive markers	Negative markers
SMG	SLPI, LYZ, BPIFB1	SMG intermediate (duct)		LYZ-low	BPIFB1, PRR4
		Serous		LYZ-high, PRR4
			Serous BPIFB1+	LYZ-high, PRR4, BPIFB1
		Epithelial not annotated	Epithelial LYZ	LYZ-high	BPIFB1, PRR4
		Mucous		LYZ-low, BPIFB1	PRR4
		Myoepithelial		LYZ, SLPI, MYL9	BPIFB1, PRR4
Bronchial epithelial	SLPI, BPIFB1	Basal	Basal KRT5 KRT15	KRT15, KRT5
			Basal KRT5	KRT5	KRT15, AGR2
		Suprabasal	Suprabasal S100A2	S100A2-high, KRT5	KRT15, AGR2
			Suprabasal intermediate (differentiating) KRT5 AGR2	S100A2, KRT5, AGR2	KRT15
			Suprabasal intermediate (differentiating) SERPINB3	S100A2, KRT5, SERPINB3	KRT15
			Suprabasal intermediate S100A8	S100A2, KRT5, S100A8	KRT15
		Secretory	Secretory AGR2	SLPI, BPIFB1, AGR2
			Secretory AGR2 MSLN	SLPI, BPIFB1, AGR2, MSLN
			Secretory AGR2 S100A4	SLPI, BPIFB1, AGR2, S100A4
			Secretory AGR2 SAT1 S100P IFI27	SLPI, BPIFB1, AGR2, SAT1, S100P, IFI27
			Secretory AGR2 ZFP36	SLPI, BPIFB1, AGR2, ZFP36
			Secretory MGP SFTPB	SLPI, MGP, SFTPB
			Secretory MUC5AC	SLPI, BPIFB1, MUC5AC
			Secretory MUC5B	SLPI, BPIFB1, MUC5B
			Secretory RNASE1	SLPI, RNASE1
			Secretory SFTPB	SLPI, SFTPB
		Deuterosomal		CDC20B
		Epithelial not annotated	Epithelial ADIRF	SLPI, ADIRF
			Epithelial C3	SLPI, C3
			Epithelial CHI3L1	SLPI, CHI3L1
			Epithelial EGR1	SLPI, EGR1
			Epithelial FABP4	SLPI, FABP4
			Epithelial TIMP1	SLPI, TIMP1
		Ciliated	Ciliated CAPS	CAPS
			Ciliated CAPS AGR2	CAPS, AGR2
			Ciliated CAPS CD24	CAPS, CD24
			Ciliated CAPS HES6	CAPS, HES6
			Ciliated CAPS MSLN	CAPS, MSLN
		Neuroendocrine	Neuroendocrine GRP	GRP
			Neuroendocrine PCSK1N	PCSK1N
		Tuft		RGS13
		Ionocytes		ASCL3, SEC11, ATP6V0B
		Rare tuft-like		HES6, NREP
		Squamous-like		SPRR1B, SPRR3
Alveolar epithelial	AGER, SFTPA1	Alveolar type I		AGER, S100A4-low
		Alveolar type II	AT2 SFTPA1	SFTPA1
			AT2 SFTPA1 CD74	SFTPA1, CD74
			AT2 SFTPA1 CD74 SLPI	SFTPA1, CD74, SLPI
			AT2 SFTPA1 RNASE1	SFTPA1, RNASE1
			AT2 SFTPA1 RNASE1 SLPI	SFTPA1, RNASE1, SLPI
			AT2 SFTPA1 SFTPB	SFTPA1, SFTPB
			AT2 SFTPA1 SFTPB SLPI	SFTPA1, SFTPB, SLPI
			AT2 SFTPA1 SFTPB CD74	SFTPA1, SFTPB, CD74
			AT2 SFTPA1 SFTPB CD74 SLPI	SFTPA1, SFTPB, CD74, SLPI
			AT2 SFTPA1 SLPI	SFTPA1, SLPI
Stromal	ACTA2, MYL9, MGP, FN1	Smooth muscle	Smooth muscle cells ACTA2	ACTA2
			Smooth muscle cells MYH11 ACTA2	MYH11, ACTA2
			Smooth muscle cells MYH11 MYL9 ACTA2	MYL9, MYH11, ACTA2
		Fibroblasts adventitial	Fibroblasts PLA2G2A	MGP, PLA2G2A
		Fibroblasts general	Fibroblasts APOD MGP	APOD, MGP
			Fibroblasts C3 MGP	C3, MGP
			Fibroblasts CFD MGP	CFD, MGP
			Fibroblasts FBLN1 MGP	FBLN1, MGP
			Fibroblasts FN1 CD74	FN1, CD74
			Fibroblasts FN1 COL1A1	FN1, COL1A1
			Fibroblasts FN1 EGR1	FN1, EGR1
			Fibroblasts FN1 MGP	FN1, MGP
			Fibroblasts FN1 MGP EGR1	FN1, MGP, EGR1
			Fibroblasts FN1 MGP RHOB	FN1, MGP, RHOB
			Fibroblasts FN1 MGP S100A4	FN1, MGP, S100A4
			Fibroblasts FN1 MGP TIMP1	FN1, MGP, TIMP1
			Fibroblasts FN1 RGCC	FN1, RGCC
			Fibroblasts FN1 RHOB	FN1, RHOB
			Fibroblasts FN1 SFTPA1	FN1, SFTPA1
		Myofibroblasts		MYL9, ACTA2, FN1
		Pericytes		MYL9, low positivity for endothelial markers	MYH11, ACTA2
Endothelial	RAMP2, ACKR1, FCN3	Venous	Venous ACKR1	ACKR1
			Venous ACKR1 CD74	ACKR1, CD74
		Capillary	Capillary FCN3	FCN3
			Capillary FCN3 CD74	FCN3, CD74
			Capillary FCN3 CLDN5 RAMP2	FCN3, CLDN5, RAMP2
			Capillary FCN3 FN1	FCN3, FN1
			Capillary FCN3 MYL9	FCN3, MYL9
		Lymphatic endothelial		CCL21
		Endothelial not annotated (incl. Arterial)		RAMP2	FCN3, ACKR1, EDNRB, CCL21
		Aerocytes		EDNRB, CLDN5, RAMP2
Immune	CD74, CD79A, CD52, S100A4	T lymphocytes	T cells CD8	CD3D, CD8A	GNLY, NKG7
			T cells not annotated	CD3D	GNLY, NKG7, CD8A
		NK cells		CD3E, CCL5, GNLY, NKG7, CD3D, CD8A
		T/NK cells		CD3E, CCL5	CD3D, GNLY, NKG7
		B lymphocytes		CD74, CD79A	JCHAIN, CST3, C1QC
		B plasma		JCHAIN
		Dendritic cells (DC)		CST3-high, HLA-DQA1, HLA-DPB1, HLA-DRA, C1QC-low
		Mast cells		HDC
		Monocytes	Monocytes S100A8	S100A8
			Monocytes S100A8 LYZ	S100A8, LYZ
			Monocytes S100A8 MYL9	S100A8, MYL9
			Monocytes S100A8 S100A4	S100A8, S100A4
		Macrophages	Macrophages C1QC	CST3-low, HLA-DQA1, HLA-DPB1, HLA-DRA, C1QC-hi
			Macrophages C1QC LYZ	CST3-low, HLA-DQA1, HLA-DPB1, HLA-DRA, C1QC-hi, LYZ
			Macrophages LYZ	CST3-low, HLA-DQA1, HLA-DPB1, HLA-DRA, LYZ

## Sheet: Sheet2
Subcluster annotations
583-LNG2			583-LNG3			583-LNG5			588-LNG2			588-LNG3			588-LNG5
