# Supplementary material for: A topographic lung cell atlas reveals regional variation in cell-type specific gene programs and identifies healthy and diseased cellular neighborhoods
Source: Research Square preprint supplement (doi:10.21203/rs.3.rs-5046381/v1), 2024-10-07
Supplement: Supplementary file 5 [file Supplementary_Table_5_Criteria_for_selecting_additional_cell_types_in_HybISS.xlsx]

## Sheet: Sheet1
Cell type	Criteria
Ionocytes	ASCL3 (>2 dots) and positivity for either SEC11C or ATP6V0B
T cells	CD3D and CD8A double positivity
NK cells	Two of these genes (CD3E, CCL5, GNLY, NKG7) detected and either CD3D or CD8A expressed
Tuft cells	RGS13 (>2 dots) and positivity for BMX
Aerocytes	Positivity for CLDN5 and/or RAMP2 within EDNRB+ cluster of mesenchymal cells
Squamous-like SPRR3	SPRR3 (>3 dots) within Epithelial nan (S100A4) cluster
Squamous-like SPRR1B	SPRR1B (>3 dots) within Suprabasal intermediate KRT5-AGR2 cluster
Rare tuft-like cells	NREP (>2 dots) and HES6 (>2 dots)
