# Supplementary material for: A topographic lung cell atlas reveals regional variation in cell-type specific gene programs and identifies healthy and diseased cellular neighborhoods
Source: Research Square preprint supplement (doi:10.21203/rs.3.rs-5046381/v1), 2024-10-07
Supplement: Supplementary file 6 [file Supplementary_Table_6_SCRINSHOT_cell_type_marker_panel.xlsx]

## Sheet: Sheet1
gene	selection_ranking	selection	Region	pca_gene	tree_gene (Spapros)	Manually_selected_marker	scRNAseq gene expression
ACAN	2	TRUE	Trachea/Proximal lung	FALSE	Chondrocytes	none	Chondrocytes
AGER	2	TRUE	Distal lung	FALSE	AT1,AT2	none	AT1
ALDH1A3	2	TRUE	Trachea/Proximal lung	FALSE	none	Duct SMG (PMID: 36543915)	Duct SMG, subsets of fibroblasts
APOE	1	TRUE	shared	TRUE	Pericytes	none	Pericytes, macrophages
AREG	1	TRUE	shared	TRUE	Mast cells	none	Mast cells, subsets of of dendritic, myeloid, T cell and AT2
BTG1	3	TRUE	Distal lung	TRUE	AT1	none	Negative in AT1, multiciliated and adventitial fibroblasts
CAPS	2	TRUE	shared	FALSE	Multiciliated,Goblet	none	Multiciliated
CCL5	1	TRUE	shared	TRUE	Lymphocyte,Mast cells	none	T lymphocytes, NK cells
CD52	3	TRUE	Distal lung	TRUE	Capillary (G) endothelial cells	none	Mast, myeloid, lymphocytes
CD69	1	TRUE	shared	TRUE	Lymphocyte	none	Lymphocytes, mast
CD74	3	TRUE	Trachea/Proximal lung	FALSE	Fibroblast (collapsed)	none	Negative in mast, AT1, muscle, fibroblasts
CD9	3	TRUE	Distal lung	FALSE	Capillary (G) endothelial cell	none	Negative in subroups of myeloid, capillary G, pericytes and fibroblasts
CDC20B	2	TRUE	Trachea/Proximal lung	FALSE	Deuterosomal	none	Deuterosomal
CENPF	2	TRUE	Trachea/Proximal lung	FALSE	Deuterosomal	none	Deuterosomal
CLDN5	2	TRUE	Distal lung	FALSE	Capillary (G) endothelial cell,capillary Aerocyte endothelial cell	none	capillary (G) endothelial cell,capillary Aerocyte endothelial cell, lower in vascular and lymphatic endothelial cells
CPA3	2	TRUE	shared	FALSE	Myeloid,Mast cells	none	Mast
CST3	1	TRUE	shared	TRUE	Lymphocyte,Myeloid,Chondrocytes,Fibroblast (collapsed)	none	Chondrocytes, fibroblasts (collapsed), myeloid, negative in lymphocytes
CXCL17	2	TRUE	Trachea/Proximal lung	FALSE	Goblet,Serous SMG	none	Goblet, serous SMG, club, AT2
CYB5A	2	TRUE	shared	FALSE	Club,Mucous SMG-Club,AT1,AT2	none	Club, AT2
CYP2F1	2	TRUE	shared	FALSE	none	Club (PMID: 29874100)	subsets of club and goblet
DCN	2	TRUE	shared	FALSE	Fibroblast (collapsed)-Adventitial Fibroblast,Lipofibroblasts	none	Fibroblast (collapsed), subsets of muscle
FABP4	1	TRUE	shared	TRUE	Lymphatic endothelial cells	none	Subsets of Lymphatic endothelial cells, subsets of venous, subsets of macrophages
FBLN1	2	TRUE	Distal lung	FALSE	Adventitial Fibroblast,Lipofibroblasts	none	Fibroblast (collapsed)
FCER1G	1	TRUE	shared	TRUE	Myeloid	none	Myeloid, NK, mast
FHOD3	2	TRUE	Trachea/Proximal lung	FALSE	none	Myoepithelial (PMID: 36543915)	Myoepithelial cells
FOS	1	TRUE	shared	TRUE	Basal	none	Negative in multiciliated, AT1, subsets of capillary g and aerocytes
HLA-DRA	1	TRUE	shared	TRUE	Myeloid,Mucous SMG	none	Myeloid, B lymphocytes
HPGD	2	TRUE	Distal lung	FALSE	Capillary Aerocyte endothelial cell	none	Capillary (Aerocyte) endothelial cell, mast cells
IFI27	2	TRUE	Distal lung	FALSE	AT2,capillary (G) endothelial cell,capillary Aerocyte endothelial cell,Lipofibroblasts	none	Endothelial (collapsed)
IFITM1	1	TRUE	shared	TRUE	(Vascular) Endothelial cell,Mesothelial cell	none	Negative in multiciliated, AT1, AT2, SMG, lymphatic endothelial cells, capillaries, myeloid, mast
IGFBP7	1	TRUE	shared	TRUE	Lymphatic endothelial cells,Pericytes,Duct SMG-capillary (G) endothelial cell	none	Lymphatic endothelial cells, pericytes, muscle, fibroblasts, venous, multiciliated
IL7R	1	TRUE	shared	TRUE	Club, capillary (G) endothelial cell	none	capillary (G) endothelial cell
KRT15	2	TRUE	Distal lung	FALSE	none	Basal (PMID: 36543915)	Basal
LCN2	2	TRUE	Trachea/Proximal lung	FALSE	Duct SMG,Goblet	none	Duct SMG, goblet, subsets of multiciliated
LGALS1	3	TRUE	shared	TRUE	Club	none	Negative in club and AT2
LTF	2	TRUE	Trachea/Proximal lung	FALSE	Duct SMG,Goblet,Serous SMG	none	Duct SMG, serous SMG
MGP	2	TRUE	Distal lung	FALSE	Adventitial Fibroblast,Lipofibroblasts	none	Adventitial fibroblasts, alveolar fibroblasts, subsets of arterial and venous, muscle and club
MKI67	2	TRUE	shared	FALSE	none	Cycling (PMID: 36543915)	Cycling
MSLN	2	TRUE	Distal lung	FALSE	none	Mesothelial cell (PMID: 36543915)	Mesothelial cells, AT1, AT2, goblet
MUC5AC	2	TRUE	Trachea/Proximal lung	FALSE	none	Goblet (PMID: 36543915)	Goblet
MUC5B	2	TRUE	Trachea/Proximal lung	FALSE	Duct SMG,Goblet,Mucous SMG,Serous SMG	none	Duct SMG, goblet, mucous SMG
NAPSA	2	TRUE	Distal lung	FALSE	AT1,AT2	none	AT1, AT2
NREP	2	TRUE	shared	FALSE	none	Rare (PMID: 32726565)	Rare
PBK	2	TRUE	shared	FALSE	none	Cycling (PMID: 36543915)	Cycling
PLD5	2	TRUE	Trachea/Proximal lung	FALSE	none	Myoepithelial (PMID: 36543915)	Myoepithelial cells
RGCC	1	TRUE	shared	TRUE	Smooth muscle, Adventitial Fibroblast, Lipofibroblasts	none	Fibroblasts alveolar
RGS5	2	TRUE	shared	FALSE	none	Pericytes (PMID: 36543915)	Pericytes
RHOB	3	TRUE	shared	TRUE	Mast cells	none	none
RNASE1	1	TRUE	shared	TRUE	(Vascular) Endothelial cell,Basal,Club,Lymphocyte,Duct SMG	none	Vascular endothelial cells, club, duct SMG
RPS29	3	TRUE	shared	TRUE	Multiciliated,Smooth muscle	none	none
S100A2	2	TRUE	shared	FALSE	Basal,Fibroblast (collapsed)	none	Basal
S100A4	3	TRUE	shared	TRUE	(Vascular) Endothelial cell,Basal,Pericytes,capillary Aerocyte endothelial cell	none	none
S100A9	1	TRUE	shared	TRUE	Myeloid	none	Myeloid
SCGB1A1	2	TRUE	shared	FALSE	none	Club (PMID: 35355018)	Club
SCGB3A1	2	TRUE	shared	FALSE	none	Club (PMID: 36543915)	Club
SCGB3A2	2	TRUE	shared	FALSE	none	Club (PMID: 35355018)	Club
SPARCL1	1	TRUE	shared	TRUE	(Vascular) Endothelial cell,Lymphatic endothelial cells,Lymphocyte,capillary (G) endothelial cell,capillary Aerocyte endothelial cell	none	Vascular endothelial cells, capillary (G) endothelial cells, capillary (Aerocyte) endothelial cells, muscle, fibroblasts, pericytes
SRGN	3	TRUE	shared	TRUE	Multiciliated,Fibroblast (collapsed) -AT1,AT2,Mesothelial cell	none	Immune (collapsed), vascular endothelial cells
TAGLN	2	TRUE	shared	FALSE	Pericytes,Smooth muscle	none	Pericytes,Smooth muscle
TFF3	2	TRUE	shared	FALSE	Basal,Lymphatic endothelial cells,Goblet,Mucous SMG,Serous SMG	none	Goblet, lymphatic endothelial cells, mucous SMG, subset of multiciliated
TIMP1	1	TRUE	Distal lung	TRUE	Adventitial Fibroblast,Mesothelial cell	none	Adventitial Fibroblast, mesothelial cells
VIM	1	TRUE	shared	TRUE	Basal,Club,Lymphatic endothelial cells,AT1	none	Lymphatic endothelial cells
ZFP36L2	3	TRUE	shared	TRUE	Pericytes	none	none, elevated levels in T/NK
ZG16B	2	TRUE	Trachea/Proximal lung	FALSE	Duct SMG,Serous SMG	none	Duct SMG,Serous SMG
