# Supplementary material for: A topographic lung cell atlas reveals regional variation in cell-type specific gene programs and identifies healthy and diseased cellular neighborhoods
Source: Research Square preprint supplement (doi:10.21203/rs.3.rs-5046381/v1), 2024-10-07
Supplement: Supplementary file 7 [file Supplementary_Table_7_SCRINSHOT_cell_type_annotation.xlsx]

## Sheet: Sheet1
Cell class (level 1)	Cell type (level 2)	Subtypes (level 3)	Positive markers	Negative markers
SMG	SMG intermediate (duct)		LCN2, SCGB3A1, ALDH1A3, MSLN, LTF and/or MUC5B
	SMG serous	Serous general	LTF	ALDH1A3, MUC5B, SCGB1A1
		Serous-SCGB3A2	LTF, SCGB3A2	ALDH1A3, MUC5B, SCGB1A1
	SMG mucous		MUC5B	MUC5AC, LTF
	Myoepithelial		KRT15, TAGLN, PLD5
Bronchial epithelial	Basal		KRT15, S100A2	LCN2
	Suprabasal		S100A2	KRT15, LCN2, MUC5AC, SCGB1A1
	Suprabasal intermediate		S100A2, LCN2	KRT15, MUC5AC, SCGB1A1
		Suprabasal intermediate S100A9	S100A9, LCN2
	Secretory club		SCGB1A1, SCGB3A1, sometimes low SCGB3A2, CAPS - intermediate cells	MUC5AC, S100A2, KRT15
		Secretory club MUC5B	MUC5B, LCN2
		Secretory club CYP2F1	CYP2F1, BPIFB1, LCN2
		Secretory club LTF	LTF
	Secretory mucous (goblet)		MUC5AC, MUC5B, LCN2
	Epithelial not annotated	Epithelial not annotated	LCN2, MSLN, CD9, BPIFB1, CYB5A or TFF3	KRT15, MUC5AC, SCGB1A1, S100A2, MUC5B
	Secretory pre-TB		SCGB3A2, SCGB3A1, SCGB1A1, RNASE1, including low CAPS - intermediate cells
	Secretory TRB		SCGB3A2, RNASE1, SCGB3A1-low, including low CAPS - intermediate cells	SCGB1A1
	Deuterosomal		CDC20B
	Ciliated		CAPS	FOS, IFITM1, MUC5AC, AGER
	Neuroendocrine	Neuroendocrine GRP	GRP, other bronchial epithelial markers	FOS, IFITM1, MUC5AC, AGER, BTG1, PLD5
		Neuroendocrine GHRL	GHRL	other green channel genes
Alveolar epithelial	Alveolar type I		AGER, RNASE1, MSLN, S100A4	FOS, IFITM1, MUC5AC
	Alveolar type II		NAPSA, MSLN
	Alveolar type 0	AT0-SCGB3A2	NAPSA, SCGB3A2
		AT0-SCGB3A1	NAPSA, SCGB3A1
		AT0-LTF	NAPSA, SCGB3A1, LTF
		AT0-LCN2	NAPSA, LCN2
Stromal	Smooth muscle		TAGLN, SPARCL1
	Fibroblasts	Fibroblasts FBLN1	FBLN1, MGP
		Fibroblasts RGCC	RGCC, MGP, FBLN1-low
		Fibroblasts TIMP1	FBLN1-low, MGP, TIMP1
		Mesenchymal not annotated	MGP
Endothelial	Endothelial general	Endothelial CLDN5	CLDN5-hi
		Endothelial SPARCL1	CLDN5-low, SPARCL1
		Endothelial TIMP1	CLDN5-low, TIMP1
		Endothelial IGFBP7 (lymphatic)	CLDN5-low, IGFBP7
		Endothelial (mixed)	CLDN5, SPARCL1, IGFBP7 (co-expressed or not splitting into clusters)
Immune	T lymphocytes		CCL5, IL7R, BTG1
	NK cells		CCL5, FCER1G, BTG1	IL7R
	B lymphocytes		HLA-DRA, CD74, BTG1	APOE, RNASE1, CST3, FCER1G, FABP4, CCL5, CD9
	Dendritic cells		HLA-DRA, CD74, CST3	APOE, RNASE1, FABP4
	Mast cells		CPA3
	Monocytes		S100A9, S100A4, TIMP1, FCER1G	LCN2, S100A2
	Macrophages	Macrophages APOE	FABP4, HLA-DRA, CD74, CD9, APOE
		Macrophages general	FABP4, HLA-DRA, CD74, CD9, RNASE1
	Immune not annotated		FCER1G, SRGN, CST3, CD52, BTG1
Neuronal	Neuronal (Schwann cells)		VIM-high, LGALS1, CD9 (+ neuronal histology)	CLDN5, TAGLN, FBLN1

## Sheet: Sheet2
Subcluster annotations
583-LNG2			583-LNG3			583-LNG5			588-LNG2			588-LNG3			588-LNG5
