# Supplementary material for: A topographic lung cell atlas reveals regional variation in cell-type specific gene programs and identifies healthy and diseased cellular neighborhoods
Source: Research Square preprint supplement (doi:10.21203/rs.3.rs-5046381/v1), 2024-10-07
Supplement: Supplementary file 9 [file Supplementary_Table_9_SCRINSHOT_experimental_marker_panels.xlsx]

## Sheet: Sheet1
Cell Type panel	Rare cell panel	COPD panel
CD69	ASCL1	AGER
CENPF	ASCL3	APOE
CXCL17	CAPS	ASCL3
CYB5A	CDC20B	CAPS
CYP2F1	CFC1	CCL5
FABP4	CHGB	CD52
FCER1G	CRYM	CDC20B
FOS	EPCAM	CLDN5
IL7R	FOXI1	COL1A2
LCN2	FOXJ1	CPA3
LGALS1	GHRL	CYB5A
LTF	GRP	ETV5
NAPSA	HES6	FABP4
RGS5	IRAG2	FBLN1
S100A9	KRT13	GHRL
SCGB3A1	KRT15	HLA-DRA
SCGB3A2	KRT6A	IL13
SPARCL1	LCN2	IL7R
ZFP36L2	MUC5AC	KRT13
ZG16B	NREP	KRT15
ACAN	PCSK1N	KRT5
AGER	POU2F3	KRT6A
ALDH1A3	RGS13	LCN2
APOE	S100A2	LTF
AREG	S100A9	MGP
BTG1	SCGB1A1	MSLN
CAPS	SCGB3A1	MSMB
CCL5	SCGB3A2	MUC5AC
CD52	SOX2	MUC5B
CD74	TAGLN	NAPSA
CD9	TFF3	RNASE1
CDC20B	VIM	S100A2
CLDN5		SCGB1A1
CPA3		SCGB3A1
CST3		SCGB3A2
DCN		SERPINB3
FBLN1		SFTPC
FHOD3		SPARCL1
HLA-DRA		TAGLN
HPGD		TFF3
IFI27		TIMP1
IFITM1
IGFBP7
KRT15
MGP
MKI67
MSLN
MUC5AC
MUC5B
NREP
PBK
PLD5
RGCC
RHOB
RNASE1
RPS29
S100A2
S100A4
SCGB1A1
SRGN
TAGLN
TFF3
TIMP1
VIM
